# Supplementary material for: mRNA-programmed translation pauses in the targeting of E. coli membrane proteins
Source: eLife. 2014 Aug 18;3:e03440. doi: 10.7554/eLife.03440 (PMC4359368; doi:10.7554/eLife.03440)
Supplement: Figure 5—source data 1. — DOI: http://dx.doi.org/10.7554/eLife.03440.013 [file elife03440s001.xls]

## Sheet: Sheet1
gene name	density in codons 16-36	density before TM2	mean density in codons 16-36 and before TM2	whole cell fluorescence	unfolded expression	folded expression	total expression	%unfolded	loop1 length	TM1 start	locus tag	gi number	protein function
glpT	2.23858	11.888	7.06331	294.34	0.11782	1.15869	1.27651	9.22991	20	26	b2240	16130175	sn-glycerol-3-phosphate transporter
yicL	6.26137	6.14815	6.20476	312.34	0.354165	1.04439	1.39856	25.3237	13	7	b3660	16131530	predicted inner membrane protein
sbmA	5.90601	1.57717	3.74159	279.34	1.27176	1.12991	2.40167	52.953	31	10	b0377	16128362	microcin B17 transporter
yqjF	1.46406	3.2617	2.36288	259.34	9.31374	0.832158	10.1459	91.7981	17	10	b3101	90111539	predicted quinol oxidase subunit
rstB	2.50385	0.33795	1.4209	82.34	0.0109273	0.262349	0.273277	3.99861	108	8	b1609	16129567	sensory histidine kinase in two-component regulatory system with RstA
yhjE	0.470104	6.59889	3.5345	319.34	3.40479	1.20842	4.61321	73.8052	13	24	b3523	16131395	inner membrane protein, predicted transporter
yeeF	2.79954	8.22437	5.51195	573.34	0.604679	2.40905	3.01373	20.0641	22	15	b2014	90111370	putrescine importer, low affinity
proY	3.65811	0.698958	2.17853	427.34	1.84975	1.55975	3.4095	54.2527	8	16	b0402	16128387	proline-specific permease
aroP	1.80839	4.38837	3.09838	125.34	0.0342822	0.557264	0.591546	5.79535	12	20	b0112	16128105	aromatic amino acid transporter
pheP	0.720581	3.75863	2.23961	562.34	1.05505	2.62641	3.68146	28.6585	8	28	b0576	16128559	phenylalanine transporter
cycA	2.48289	1.50058	1.99174	372.34	3.89408	1.63052	5.5246	70.4861	12	28	b4208	16132030	D-alanine/D-serine/glycine transporter
brnQ	1.94233	0.447229	1.19478	270.34	3.71466	1.00065	4.71531	78.7787	12	10	b0401	16128386	Branched-chain amino acid transport system 2 carrier protein; LIV-II transport system for Ile, Leu, and Val
atpI	2.39534	0.625523	1.51043	437.34	0.57908	1.58611	2.16519	26.745	5	14	b3739	90111645	ATP synthase, membrane-bound accessory factor
mreD	1.19315	1.74248	1.46781	156.34	0.149635	0.614925	0.764561	19.5714	5	10	b3249	16131137	cell wall structural complex MreBCD transmembrane component MreD
pgsA	1.03803	2.52702	1.78252	231.34	4.03082	0.706994	4.73781	85.0776	6	8	b1912	16129859	phosphatidylglycerophosphate synthetase
tatC	1.55864	0.457681	1.00816	313.34	2.67151	0.943943	3.61546	73.8915	45	18	b3839	16131687	TatABCE protein translocation system subunit
nhaA	3.19814	0.243727	1.72093	261.34	0	1.03704	1.03704	0	30	14	b0019	16128013	sodium-proton antiporter
gltP	3.98528	1.30579	2.64553	189.34	2.28796	0.580396	2.86836	79.7656	20	8	b4077	16131903	glutamate/aspartate:proton symporter
shiA	3.15509	1.3369	2.24599	38.34	0	0.0857963	0.0857963	0	15	25	b1981	16129925	shikimate transporter
secY	3.9307	3.83387	3.88229	175.34	0.0293069	0.294219	0.323526	9.05859	36	20	b3300	16131179	preprotein translocase membrane subunit
yifK	1.84179	3.19802	2.51991	247.34	2.26092	1.68332	3.94424	57.3221	12	17	b3795	49176414	predicted transporter
ampG	5.63279	4.99871	5.31575	513.34	1.58791	2.02063	3.60855	44.0043	12	16	b0433	16128418	muropeptide transporter
ychM	2.10724	4.89525	3.50124	265.34	0.533685	0.769469	1.30315	40.9533	7	34	b1206	90111235	predicted transporter
yjiY	4.30559	1.23876	2.77218	388.34	0.481967	1.67677	2.15874	22.3263	6	10	b4354	90111739	predicted inner membrane protein
yciS	1.84215	2.27293	2.05754	607.34	2.00483	2.38474	4.38957	45.6727	20	5	b1279	16129240	inner membrane DUF1049 protein YciS
yijD	1.45314	0.816709	1.13493	343.34	4.90753	1.17388	6.08141	80.6973	5	10	b3964	16131802	inner membrane protein, DUF1422 family
yfdG	5.86704	0.348366	3.1077	670.34	5.10569	2.73326	7.83895	65.1323	4	10	b2350	16130282	CPS-53 (KpLE1) prophage; bactoprenol-linked glucose translocase (flippase)
yhaH	3.25016	4.28573	3.76795	795.34	4.91166	2.89399	7.80565	62.9244	37	24	b3103	16130998	inner membrane protein, DUF805 family
ybaN	3.01266	2.71549	2.86408	303.34	4.68017	1.29029	5.97046	78.3888	7	5	b0468	16128452	inner membrane protein, DUF454 family
ygdD	1.37703	1.46774	1.42239	241.34	2.36046	0.799432	3.15989	74.7007	18	5	b2807	16130714	inner membrane protein, UPF0382 family
mscL	8.73586	1.24458	4.99022	219.34	3.11804	0.635704	3.75375	83.0648	38	16	b3291	16131170	mechanosensitive channel protein, high conductance
ybhQ	3.51228	3.21205	3.36217	799.34	3.95549	2.13234	6.08783	64.9738	5	13	b0791	16128759	inner membrane protein
ydgK	2.66137	3.06566	2.86352	133.34	0	0.219308	0.219308	0	17	17	b1626	90111308	inner membrane protein, DUF2569 family
yfeZ	1.15747	0.122486	0.639976	149.34	0	0.531854	0.531854	0	20	20	b2433	90111434	inner membrane protein
ycdZ	2.01255	3.71302	2.86278	295.34	1.38315	0.829176	2.21233	62.5202	16	16	b1036	90111206	inner membrane protein, DUF1097 family
lspA	1.46962	5.70855	3.58908	625.34	2.66599	2.58221	5.2482	50.7981	39	12	b0027	16128021	prolipoprotein signal peptidase (signal peptidase II)
dsbB	3.313	0.511733	1.91237	497.34	1.46051	1.65892	3.11942	46.8198	12	14	b1185	49176085	oxidoreductase that catalyzes reoxidation of DsbA protein disulfide isomerase I
cybB	2.32266	1.54608	1.93437	423.34	3.11042	2.1126	5.22302	59.5521	15	10	b1418	90111268	cytochrome b561
yaaH	1.94378	1.81003	1.87691	244.34	0.457094	0.133723	0.590818	77.3664	4	12	b0010	16128004	inner membrane protein, Grp1_Fun34_YaaH family
btuC	2.20941	0.92507	1.56724	185.34	0.495159	0.56473	1.05989	46.718	21	15	b1711	16129667	vitamin B12 transporter subunit: membrane component of ABC superfamily
YhfC	2.42776	1.02747	1.72761	336.34	5.3042	1.36402	6.66822	79.5444	16	14	b3364	16131243	predicted transporter
emrB	2.69021	2.0327	2.36146	302.34	0.351991	0.582793	0.934784	37.6548	27	7	b2686	16130598	multidrug efflux system protein
fdoI	1.45441	3.64935	2.55188	452.34	5.16641	2.3448	7.51121	68.7827	21	15	b3892	16131732	formate dehydrogenase-O, cytochrome b556 subunit
cydB	5.97803	1.5717	3.77486	436.34	0.187348	2.12537	2.31271	8.10079	49	9	b0734	16128709	cytochrome d terminal oxidase, subunit II
YgeD	2.66644	1.80124	2.23384	345.34	0.0509649	1.31216	1.36313	3.73882	12	19	b2835	16130739	lysophospholipid transporter
cstA	1.9842	1.86256	1.92338	294.34	0.187372	1.30694	1.49431	12.539	8	7	b0598	16128581	carbon starvation protein
ydiK	1.34393	1.16515	1.25454	101.34	1.82245	0.309351	2.1318	85.4887	5	13	b1688	16129644	inner membrane protein, UPF0118 family
mrdB	1.01271	2.23445	1.62358	204.34	0.269209	0.909899	1.17911	22.8316	38	20	b0634	16128617	cell wall shape-determining protein
ycaD	1.64837	3.81155	2.72996	390.34	0.200886	1.6907	1.89158	10.62	10	9	b0898	16128865	predicted MFS-type transporter
ydhP	3.20762	2.0004	2.60401	598.34	7.83187	2.08849	9.92035	78.9475	19	5	b1657	16129615	predicted transporter
emrD	3.23337	4.31832	3.77585	206.34	4	1.00098	5.00098	79.9843	19	10	b3673	90111634	multidrug efflux system protein
bcr	2.78433	5.56588	4.1751	320.34	0.166067	1.32464	1.49071	11.1401	21	8	b2182	16130120	bicyclomycin/multidrug efflux system
hemY	2.07913	1.21111	1.64512	322.34	8.11086	0.957943	9.0688	89.4369	20	5	b3802	16131654	predicted protoheme IX synthesis protein
yedE	1.69504	1.48927	1.59216	194.34	1.26505	0.649357	1.91441	66.0806	47	15	b1929	16129876	predicted inner membrane protein
ybjJ	0.870537	0.775068	0.822803	426.34	4.60286	1.31854	5.9214	77.7326	8	15	b0845	16128813	predicted transporter
ydhC	2.86991	3.10502	2.98746	569.34	1.63844	2.59089	4.22933	38.7399	15	7	b1660	49176132	predicted transporter
cmr	3.37944	8.53472	5.95708	652.34	0.203094	2.79242	2.99552	6.77992	24	16	b0842	16128810	multidrug efflux system protein MdfA
YgjU	2.01552	3.45	2.73276	240.34	0.128045	0.92898	1.05702	12.1137	12	17	b3089	16130984	sodium:serine/threonine symporter
ftsW	3.72412	1.8207	2.77241	108.34	0.00529995	0.287087	0.292387	1.81265	20	48	b0089	16128082	Lipid II flippase; integral membrane protein involved in stabilizing FstZ ring during cell division
rfbX	1.75771	2.87598	2.31685	94.34	0.0847845	0.223849	0.308633	27.471	13	12	b2037	16129977	predicted polisoprenol-linked O-antigen transporter
wzxE	2.70268	0.676456	1.68957	228.34	0.0422762	0.973439	1.01572	4.16221	15	12	b3792	16131648	O-antigen translocase
nupG	3.31767	5.63107	4.47437	137.34	0.00776844	0.39186	0.399629	1.94392	10	10	b2964	90111521	nucleoside transporter
codB	4.16403	1.78726	2.97564	857.34	0.144801	3.16721	3.31201	4.37199	13	20	b0336	16128321	cytosine transporter
rfaL	2.01809	0.481203	1.24965	179.34	0.0301293	0.760515	0.790645	3.81072	5	18	b3622	16131493	O-antigen ligase
yjdF	0.482793	0.91562	0.699207	241.34	1.99412	0.900408	2.89452	68.8927	5	8	b4121	16131947	conserved inner membrane protein
dedA	4.98776	12.6208	8.80426	544.34	1.8612	2.57433	4.43553	41.9611	5	5	b2317	16130252	conserved inner membrane protein
yhhQ	4.94694	4.29765	4.62229	749.34	6.37939	3.34919	9.72858	65.5737	12	13	b3471	16131343	inner membrane protein, DUF165 family
gltK	1.5427	1.59782	1.57026	230.34	0.762062	0.755308	1.51737	50.2226	14	16	b0653	16128636	glutamate, aspartate ABC transporter permease subunit
YdgQ	2.18162	1.52218	1.8519	235.34	0.12942	0.275478	0.404898	31.9635	5	17	b1632	16129590	electron transport complex inner membrane NADH-quinone reductase required for the reduction of SoxR
yeiU	1.97145	4.97436	3.4729	643.34	1.03544	3.19674	4.23218	24.4659	37	8	b2174	90111400	Lipid A 1-diphosphate synthase; undecaprenyl pyrophosphate:lipid A 1-phosphate phosphotransferase
artQ	1.33494	4.03152	2.68323	276.34	4.53464	1.04364	5.57828	81.2911	14	14	b0862	16128830	arginine transporter subunit
ccmC	2.31659	0.536674	1.42663	521.34	0.29204	1.70174	1.99378	14.6475	23	20	b2199	16130136	heme exporter subunit
yciC	0.472763	4.11898	2.29587	637.34	1.0319	2.77545	3.80735	27.1027	46	20	b1255	16129216	inner membrane protein, UPF0259 family
pgpB	3.45985	1.39915	2.4295	708.34	0.558234	3.16076	3.71899	15.0104	25	8	b1278	16129239	phosphatidylglycerophosphatase B
yadH	6.86867	4.02543	5.44705	277.34	1.10956	0.975103	2.08466	53.2249	13	22	b0128	16128121	predicted transporter subunit: membrane component of ABC superfamily
potB	1.6664	0.159443	0.912924	93.34	0.0536199	0.118458	0.172078	31.1602	36	5	b1125	162135921	polyamine transporter subunit
focA	1.38841	3.12587	2.25714	148.34	1.29294	0.420542	1.71348	75.4569	14	35	b0904	16128871	formate channel
htpX	4.67284	4.5974	4.63512	214.34	0.255146	0.0900709	0.345217	73.9089	12	5	b1829	16129783	predicted endopeptidase
YbiF	4.14988	4.66265	4.40627	785.34	0.0806288	3.5711	3.65173	2.20796	18	8	b0813	16128781	threonine and homoserine efflux system
rarD	1.19154	1.30159	1.24657	614.34	0.219114	2.99781	3.21692	6.81131	5	10	b3819	49176418	predicted chloramphenical resistance permease
dppC	2.96746	1.83031	2.39889	295.34	0.0963421	0.824688	0.921031	10.4603	48	32	b3542	16131414	dipeptide/heme transporter
oppC	2.61204	0.430636	1.52134	373.34	7.08589	1.39605	8.48194	83.5409	42	39	b1245	16129206	oligopeptide transporter subunit
rbsC	3.49275	0.17053	1.83164	117.34	0.0886645	0.382365	0.47103	18.8235	20	15	b3750	16131618	D-ribose transporter subunit
tehA	3.57523	4.75037	4.1628	292.34	3.07398	0.63575	3.70973	82.8626	13	12	b1429	16129388	potassium-tellurite ethidium and proflavin transporter
yeeA	3.09416	2.37248	2.73332	85.34	0.163814	0.242848	0.406661	40.2826	42	21	b2008	16129949	inner membrane protein, FUSC family
yjgQ	1.37256	1.40907	1.39081	209.34	0.103186	0.703215	0.806401	12.7959	29	16	b4262	90111715	lipopolysaccharide export ABC permease of the LptBFGC export complex
basS	3.78436	0.951743	2.36805	243.34	0.194887	0.905206	1.10009	17.7155	30	15	b4112	16131938	sensory histidine kinase in two-component regulatory system with BasR
outliers to the data (not analyzed)
nirC	1.46361	4.88894	3.17627	170.34	20.2143	0.220104	20.4344	98.9229	17	25	b3367	90111575	nitrite transporter
yfbV	2.20405	2.12477	2.16441	1548.34	7.21811	6.89775	14.1159	51.1348	6	48	b2295	16130230	inner membrane protein, UPF0208 family
legend
gene name: is according to Daley et al, Science. 2005 May 27;308(5726):1321-3, from which the plasmid library was obtained
density in codons 16-36: is the mean codon density (median-normalized) in codons 16-36
density before TM2: is the mean codon density (median-normalized) in codons -5 to +1 relative to TM2 start
mean density in codons 16-36 and before TM2: is the mean of the above two papameters
whole cell fluorescence: Fluorescence measurements in whole cells were done after dilution of all cells to the same O.D.600 of 0.5
unfolded expression*: as quantified by western
folded expression*: as quantified by in-gel fluorescence measurements
total expression*: as quantified by both Western and in-gel fluorescence
%unfolded: reflects fraction of unfolded form the total protein
loop1 length: number of residues between TM1 and TM2
TM1 start: position of the first residue of TM1 in the protein sequence
locus tag: gene identifier
gi number: gene identifier
protein function: taken from NCBI
* All expression values are normalized to the level of folded EmrD protein
