# Supplementary material for: mRNA-programmed translation pauses in the targeting of E. coli membrane proteins
Source: eLife journal article supplement (doi:10.7554/elife.03440), 2014-08-18
Supplement: supp [file elife-03440-supp-v1.zip]

|             |                   |             |             |     |             |     |     |     |             |     |             |             |     |     |             |             |     |     |             |     |             |     |             |             |
|-------------|-------------------|-------------|-------------|-----|-------------|-----|-----|-----|-------------|-----|-------------|-------------|-----|-----|-------------|-------------|-----|-----|-------------|-----|-------------|-----|-------------|-------------|
| <b>ygdD</b> | <b>AA (21-43)</b> | G           | A           | F   | G           | A   | H   | V   | L           | S   | K           | T           | M   | G   | A           | V           | E   | M   | G           | W   | I           | Q   | T           | G           |
|             | <b>Wild-type</b>  | GGC         | GCT         | TTT | GGC         | GCG | CAT | GTG | TTA         | AGT | AAA         | ACC         | ATG | GGG | GCC         | GTT         | GAG | ATG | GGC         | TGG | ATC         | CAG | ACC         | GGC         |
|             | <b>Mutant</b>     | GG <b>G</b> | GC <b>G</b> | TTT | GG <b>G</b> | GCG | CAT | GTG | TT <b>G</b> | AGT | AA <b>G</b> | AC <b>G</b> | ATG | GGG | GC <b>G</b> | GT <b>G</b> | GAG | ATG | GG <b>G</b> | TGG | AT <b>A</b> | CAG | AC <b>G</b> | GG <b>G</b> |

|             |                   |             |             |             |             |             |     |     |     |     |     |     |     |             |             |             |     |             |             |              |     |             |
|-------------|-------------------|-------------|-------------|-------------|-------------|-------------|-----|-----|-----|-----|-----|-----|-----|-------------|-------------|-------------|-----|-------------|-------------|--------------|-----|-------------|
| <b>brnQ</b> | <b>AA (21-41)</b> | F           | V           | G           | A           | G           | N   | I   | I   | F   | P   | P   | M   | V           | G           | L           | Q   | A           | G           | E            | H   | V           |
|             | <b>Wild-type</b>  | TTC         | GTC         | GGC         | GCA         | GGT         | AAC | ATT | ATT | TTC | CCT | CCA | ATG | GTC         | GGC         | TTA         | CAG | GCA         | GGC         | GAA          | CAC | GTC         |
|             | <b>Mutant</b>     | TT <b>T</b> | GT <b>G</b> | GG <b>G</b> | GC <b>G</b> | GG <b>G</b> | AAC | ATT | ATT | TTC | CCT | CCA | ATG | GT <b>G</b> | GG <b>G</b> | TT <b>G</b> | CAG | GC <b>G</b> | GG <b>G</b> | GAG <b>G</b> | CAC | GT <b>G</b> |

|             |                   |             |             |             |             |     |     |             |     |             |             |             |     |             |             |             |             |
|-------------|-------------------|-------------|-------------|-------------|-------------|-----|-----|-------------|-----|-------------|-------------|-------------|-----|-------------|-------------|-------------|-------------|
| <b>ybjJ</b> | <b>AA (24-39)</b> | P           | G           | L           | L           | M   | A   | S           | W   | A           | T           | R           | T   | P           | A           | I           | R           |
|             | <b>Wild-type</b>  | CCA         | GGC         | CTG         | TTA         | ATG | GCG | TCC         | TGG | GCA         | ACC         | CGT         | ACG | CCT         | GCT         | ATC         | CGC         |
|             | <b>Mutant</b>     | CC <b>G</b> | GG <b>G</b> | <b>T</b> TG | TT <b>G</b> | ATG | GCG | TC <b>G</b> | TGG | GC <b>G</b> | AC <b>G</b> | <b>A</b> GG | ACG | CC <b>G</b> | GC <b>G</b> | AT <b>A</b> | <b>A</b> GG |
