# Supplementary figures and images for: mRNA-programmed translation pauses in the targeting of E. coli membrane proteins
Source: eLife journal article supplement (doi:10.7554/elife.03440), 2014-08-18

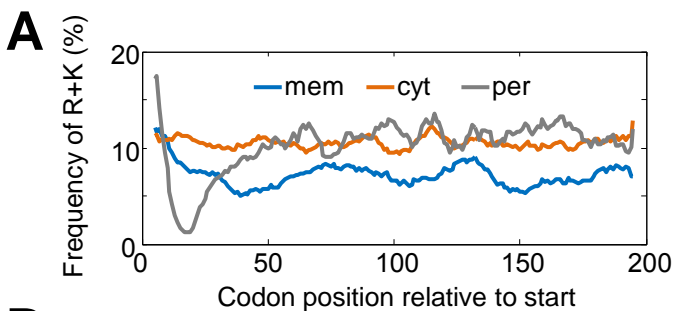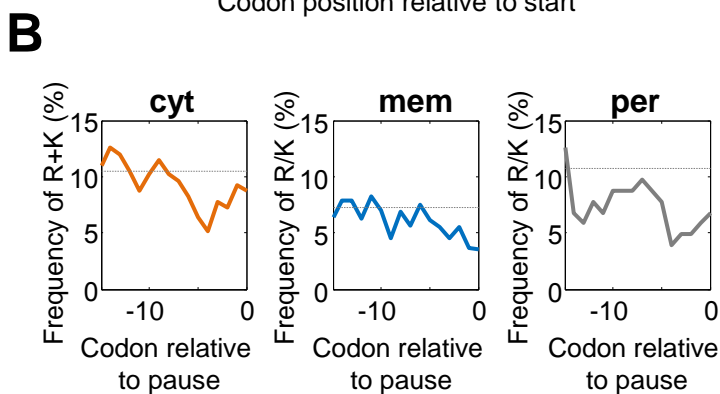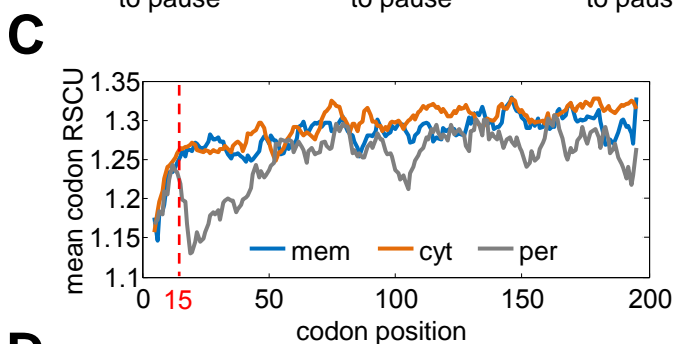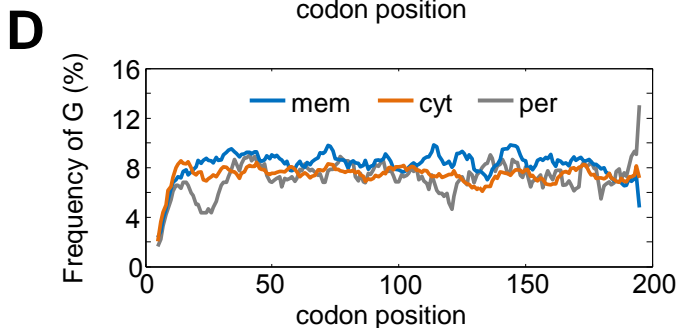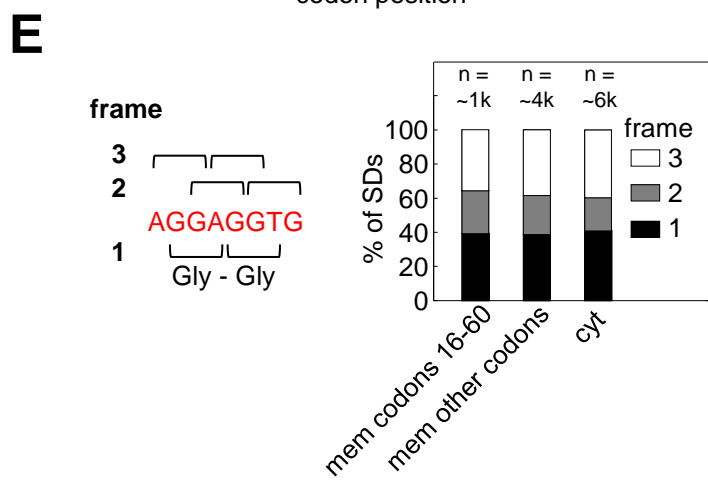

Supplement: supp [file elife-03440-supp-v1.zip]

# A

Grouping by rate  
at codons 16 - 36

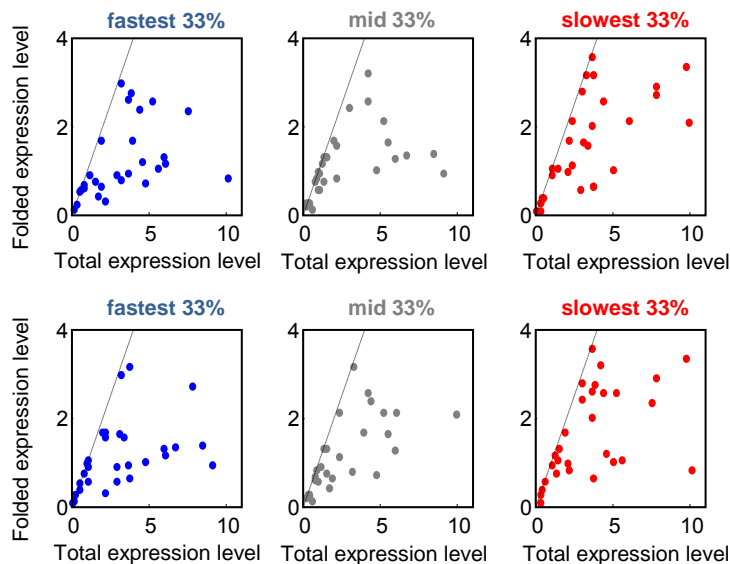

Grouping by rate  
before TM2

# B

Codons  
16 - 60

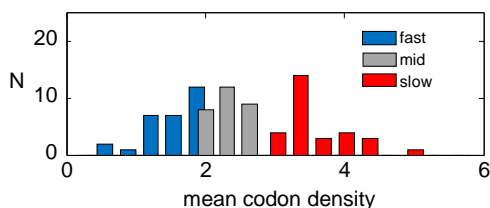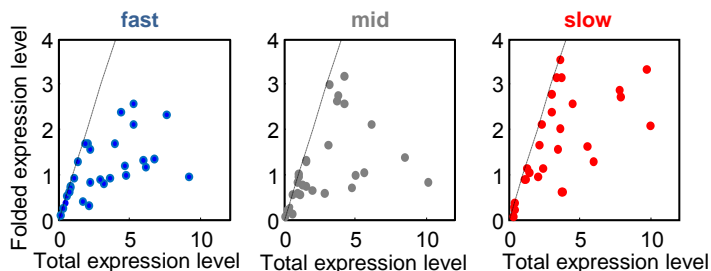

Codons  
66 - 110

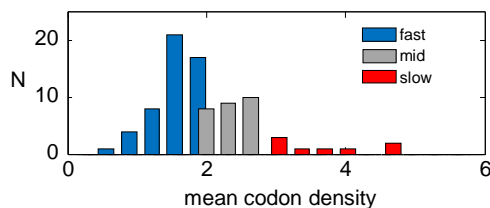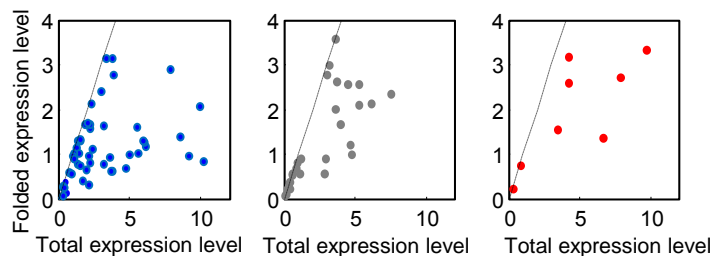

Codons  
116 - 160

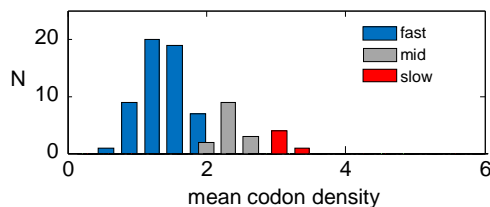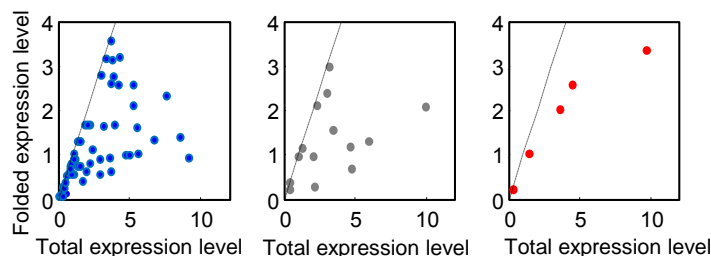

Supplement: supp [file elife-03440-supp-v1.zip]

**A**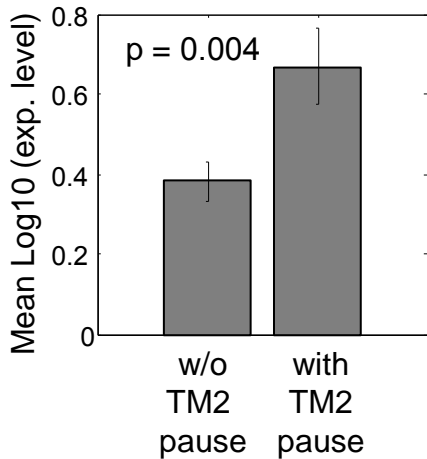**B**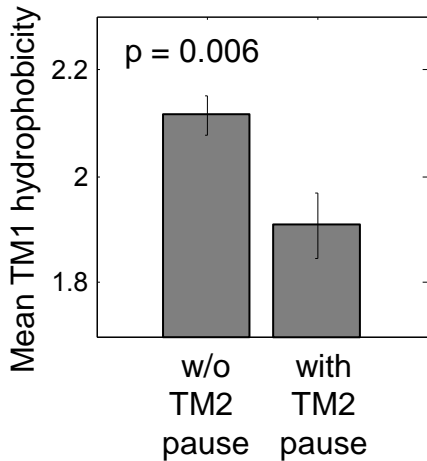

Supplement: supp [file elife-03440-supp-v1.zip]

**A**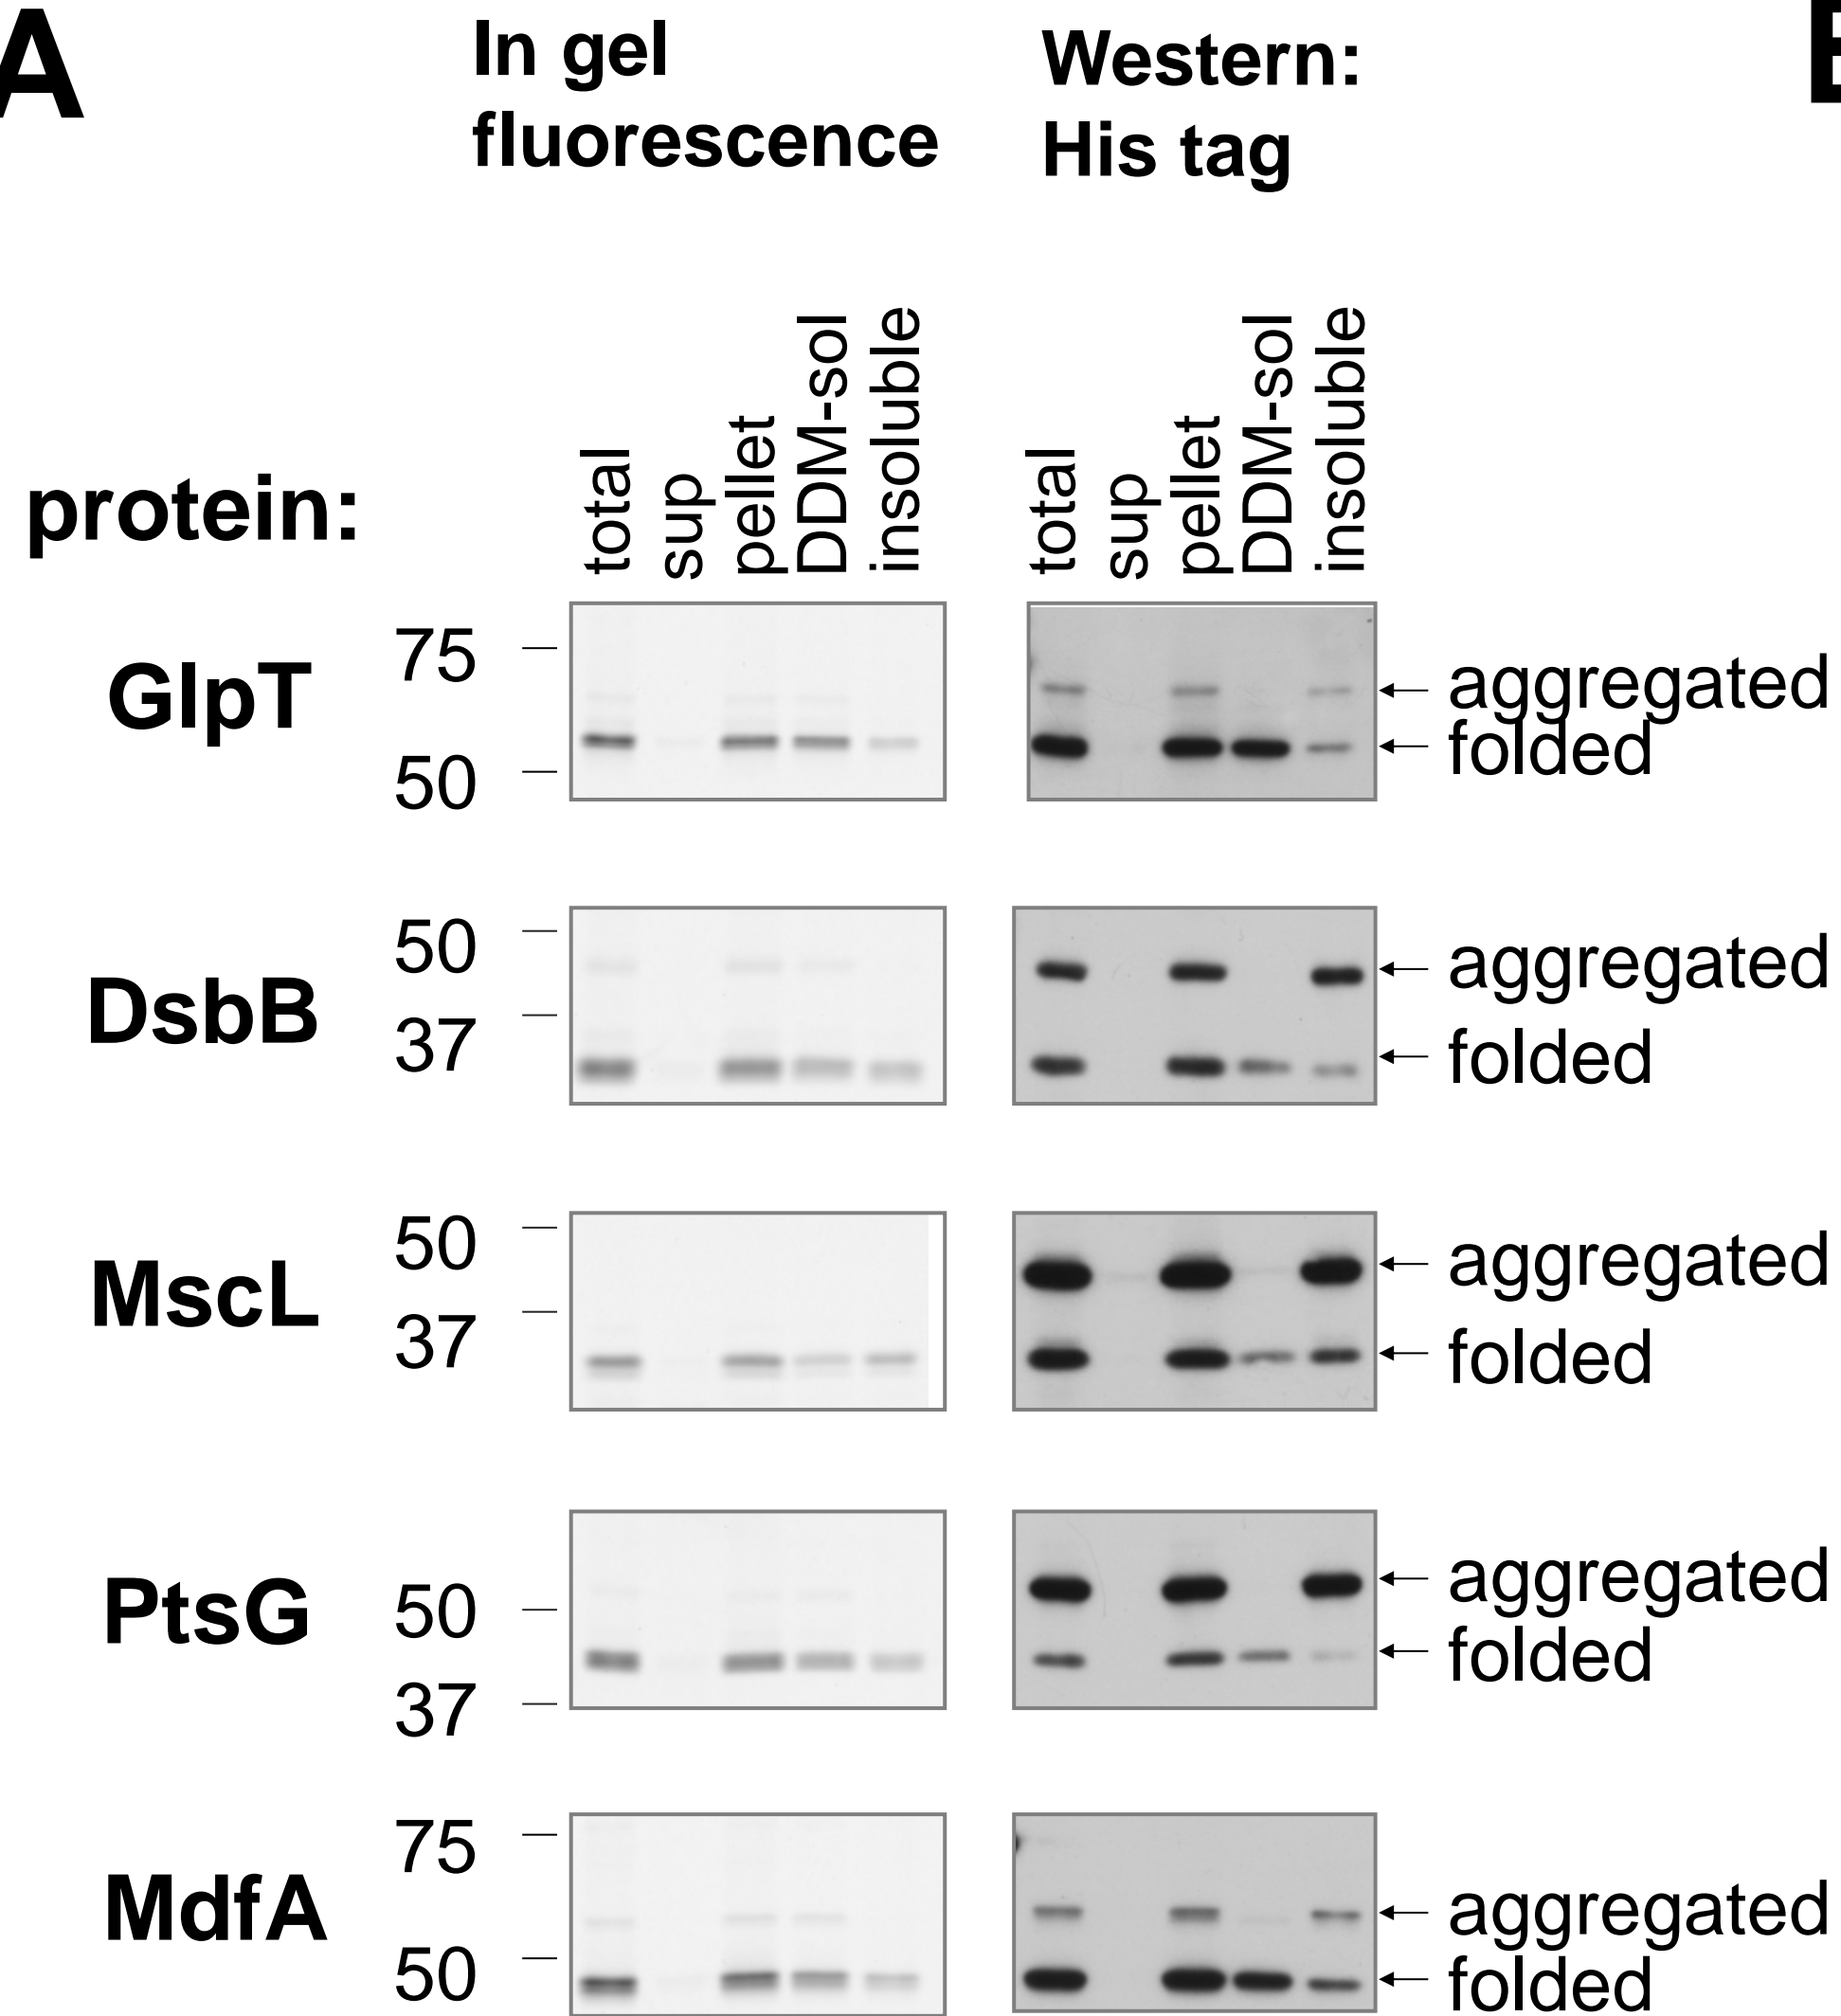**B**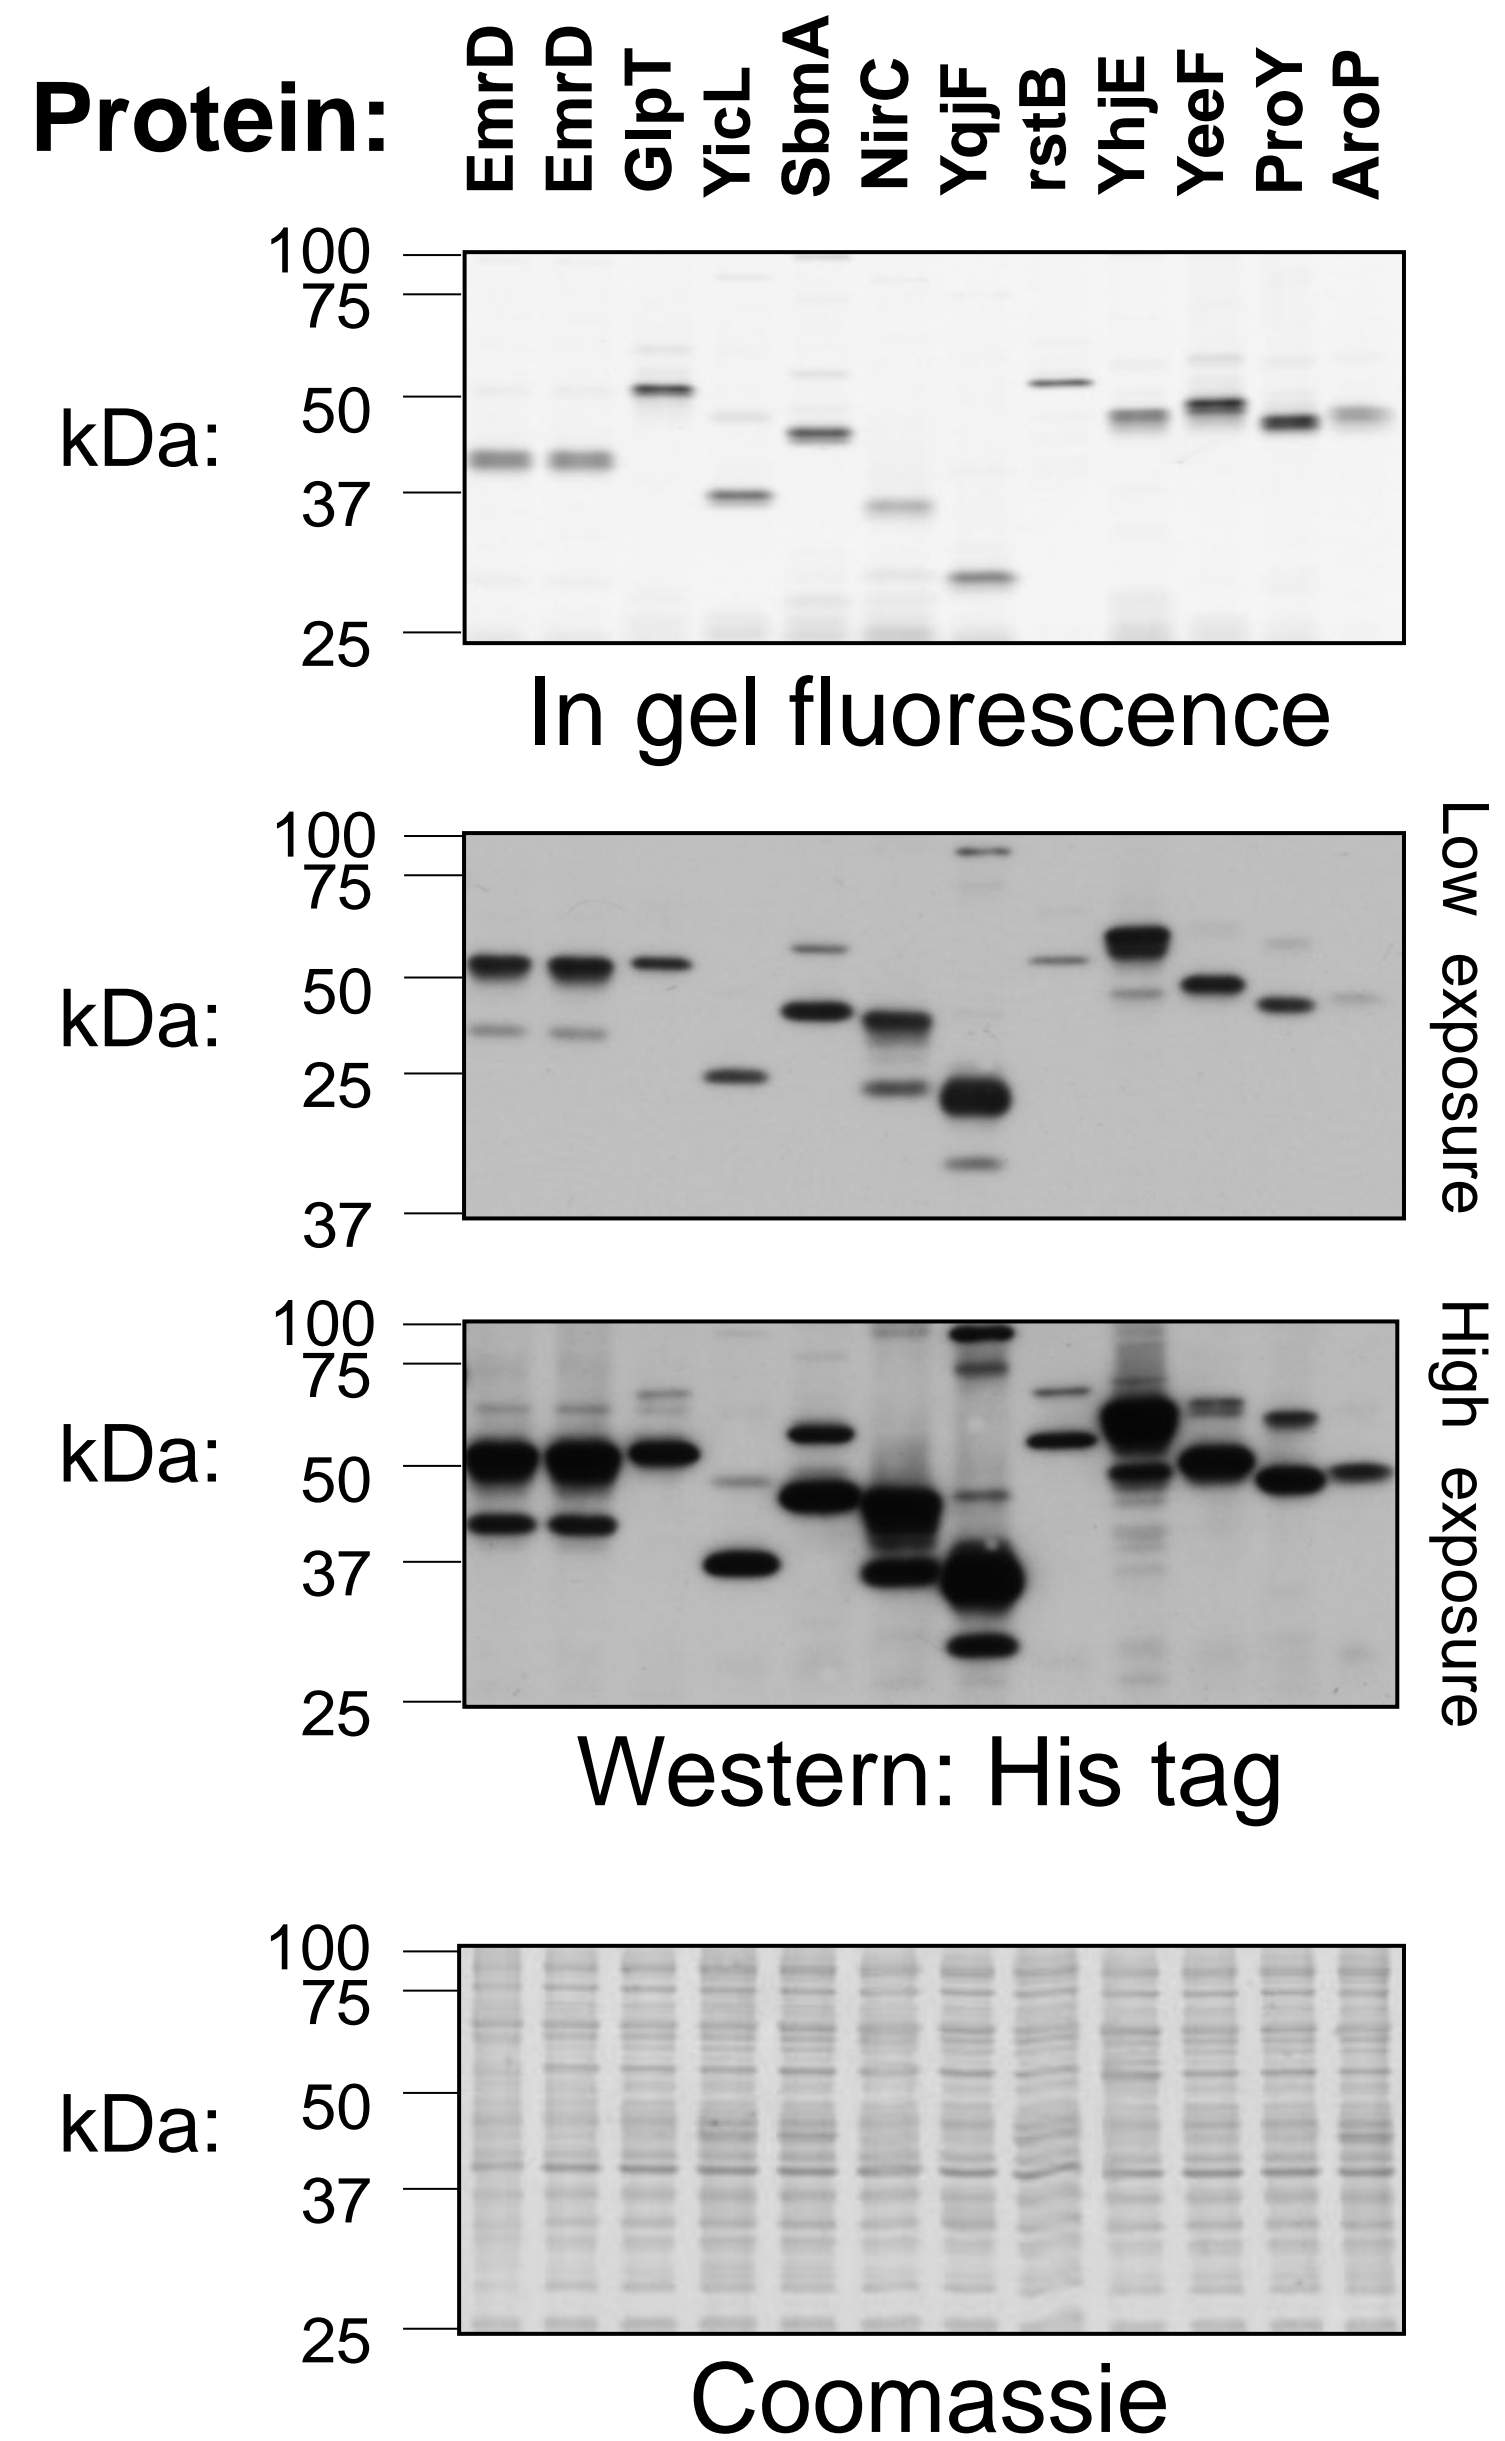

Supplement: supp [file elife-03440-supp-v1.zip]

**TM1****TM2****TM3*****E. coli***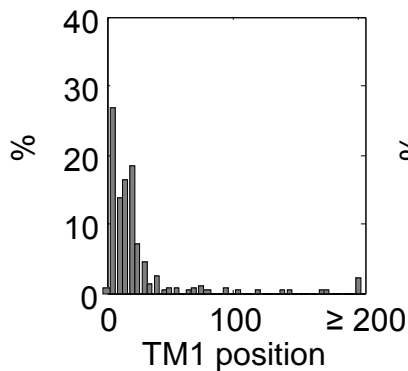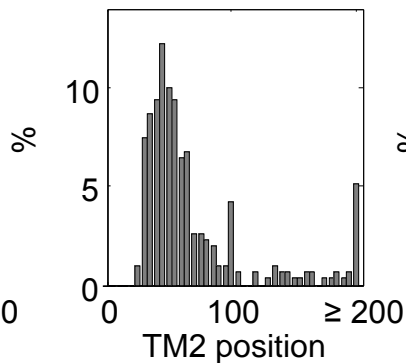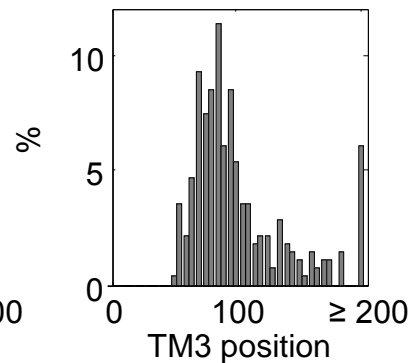***B. subtilis***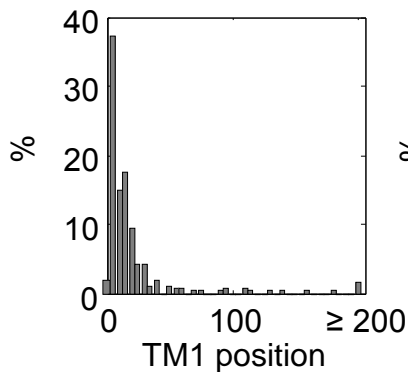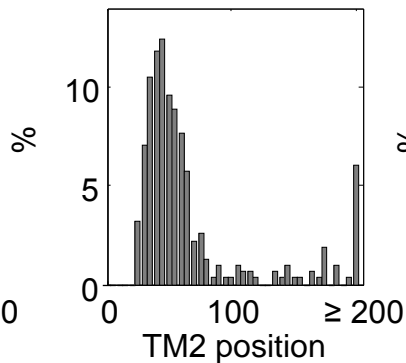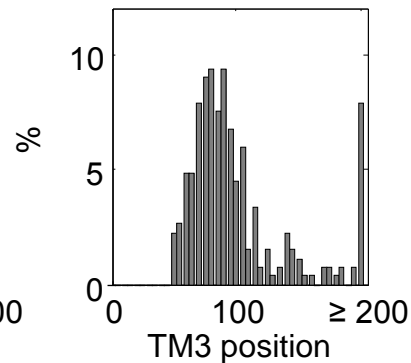

Supplement: supp [file elife-03440-supp-v1.zip]

**A**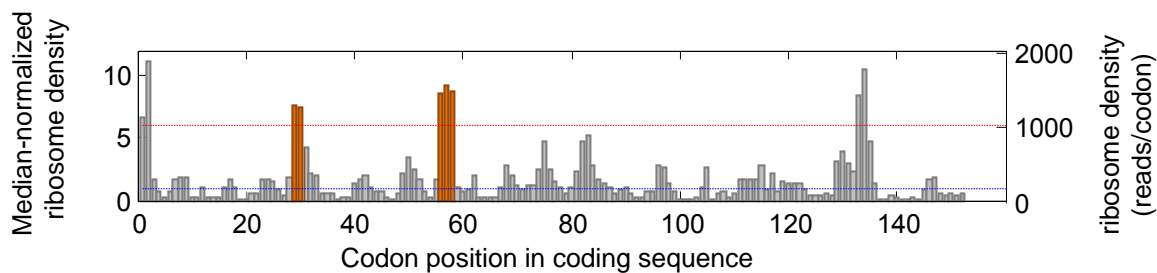**B**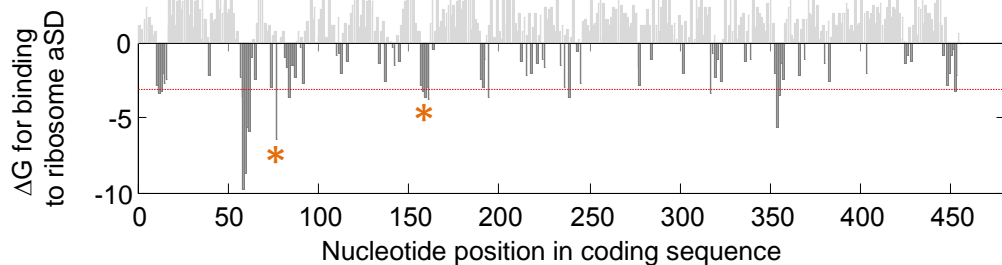**C**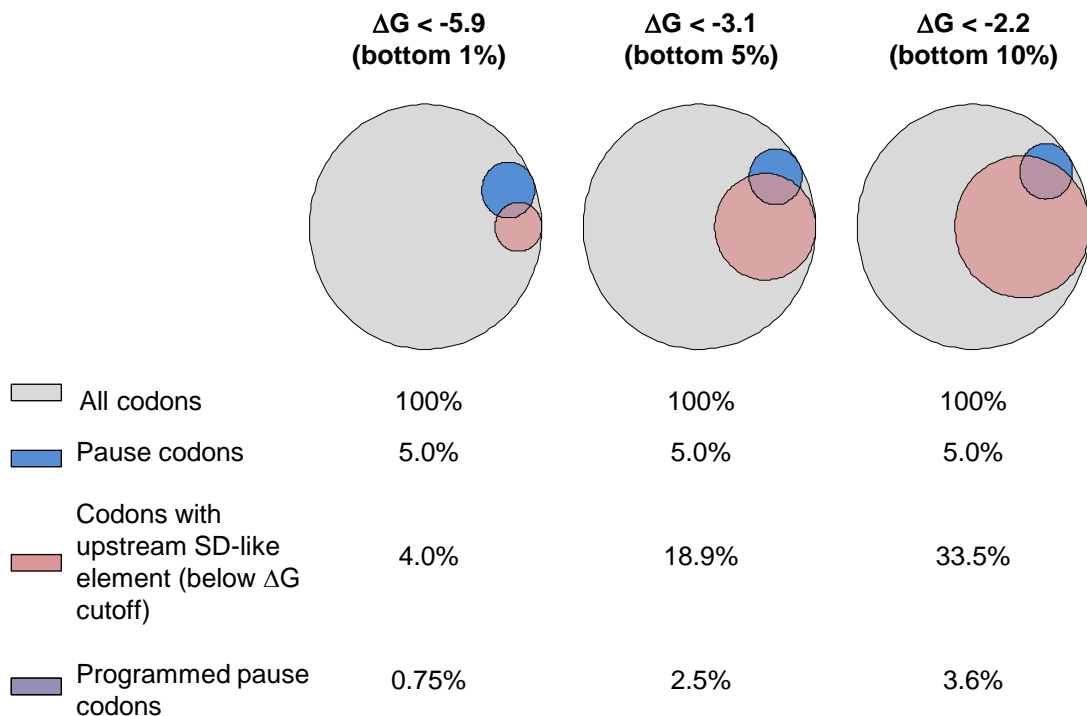

Supplement: supp [file elife-03440-supp-v1.zip]

**A**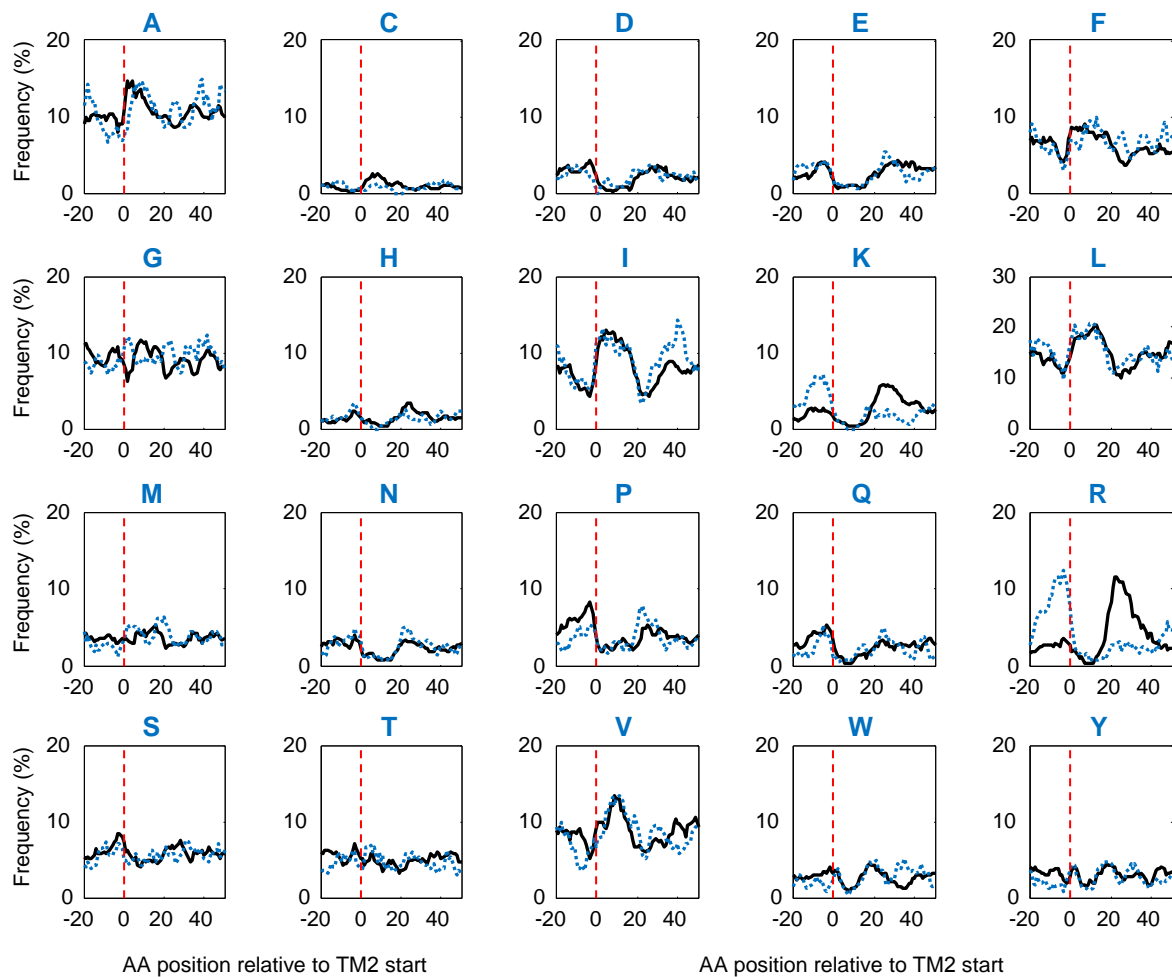**B**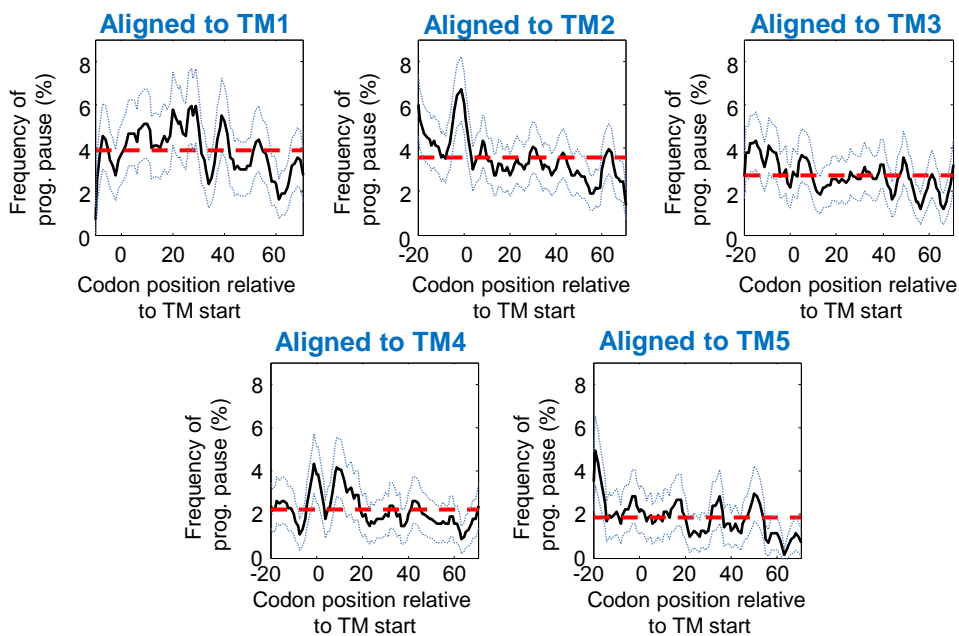

Supplement: supp [file elife-03440-supp-v1.zip]

**A**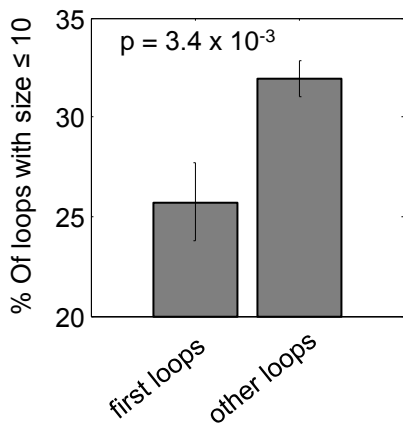**B**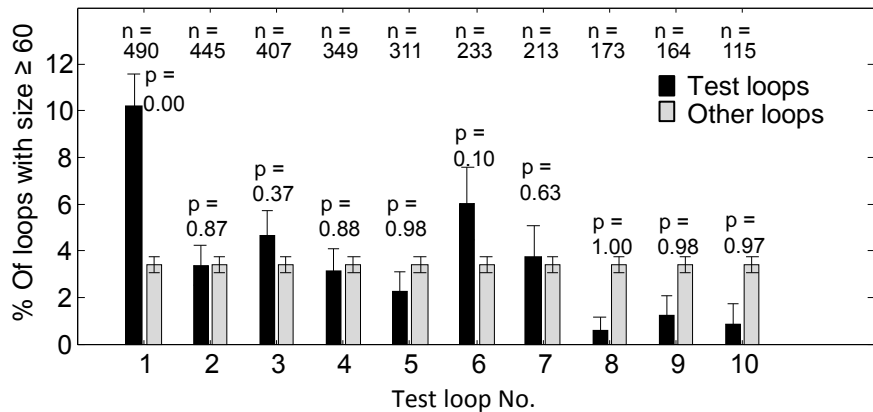

Supplement: supp [file elife-03440-supp-v1.zip]
